# Supplementary material for: Is it necessary to add the medial plate for internal fixation of distal femur fractures? —Algorithm-based decision-making for medial plate application
Source: Research Square preprint supplement (doi:10.21203/rs.3.rs-7417934/v1), 2025-09-04
Supplement: Supplementary file 1 [file 3f3ea08e7da5b49af7df2cde.docx]

*Supplement*

*Analytic Hierarchy Process (AHP)*

The AHP establishes the weights for each evaluation criterion using a comparison matrix34. Two attending physicians from our institution independently conducted pairwise comparisons of each criterion, considering specified conditions, clinical significance, and other relevant factors to determine their rankings. In cases of disagreement between the two researchers, a third, more senior physicians rendered the final decision. The methodology for pairwise comparisons is outlined in Equation (1):

(1)

and represents the weights of indicators *i* and *j*, respectively. The variable denotes the number of indicators being compared, while means the ratio of these weights. Furthermore, the scale used to assess the importance of constructing the comparison matrix is detailed in Table 1.

Table 1: Scale of relative importance in AHP scale

| Definition | Intensity of relative importance |
| --- | --- |
| Equal importance | 1 |
| Moderate importance | 3 |
| Strong importance | 5 |
| Very strong importance | 7 |
| Extreme strong importance | 9 |
| Intermediate values | 2、4、6、8 |

The comparison matrix could be obtained through pairwise comparisons of the indicators:

(2)

It is essential to perform a consistency evaluation to ensure the reliability of the single-ranking vector derived from the weight coefficients. During this process, the largest eigenvalue λ of the eigenvector is influenced by ​. That a larger value of λ indicates a greater degree of inconsistency within matrix A. The eigenvector must be defined initially, which could be calculated by Equation (3)34:

(3)

In this context,  represents the eigenvector,  is the sum of the normalized values in each row of the matrix, and  is the number of indicators. The maximum eigenvalue ()​ is then calculated by multiplying the number of columns by the principal eigenvector (​), Eq. (4):

(4)

Subsequently, the consistency index and consistency ratio are determined calculated according to Equations (5) and (6)35:

(5)

(6)

CR refers to the consistency ratio, CI denotes the consistency index, and RI is the ratio index (Table 1). If CR is < 0.1, the comparison matrix would be considered consistent. Conversely, if CR ≥ 0.1, it indicates the matrix required revision to address any logical inconsistencies before being re-evaluated for consistency.

Table 1: Ratio index34.

|  | 1 | 2 | 3 | 4 | 5 | 6 | 7 | 8 | 9 |
| --- | --- | --- | --- | --- | --- | --- | --- | --- | --- |
| RI | 0 | 0 | 0.58 | 0.90 | 1.12 | 1.24 | 1.32 | 1.41 | 1.45 |

*Fuzzy Comprehensive Evaluation (FCE)*

We utilized the Z and π membership function tools in MATLAB R2021b to create the membership functions for each indicator, corresponding to “suitable” and “unsuitable”. The basic expressions for the two functions is as follows:

(7)

(8)

In equations (7) and (8), *a, b, c*, and *d* are four preset constants that are arranged in ascending order. Furthermore, it is apparent from the function expressions thattypically shows a “unidirectional” change, while exhibits a “bidirectional” characteristic. Additionally, the expressions for the “1-Z” type and “1-” type functions are “” and “”, respectively.

*Fuzzy judgment matrix*

As the size of the defect increases within the range of [0, 30], the indicators would change correspondingly. The expressions derived from the fitting function are substituted into the respective membership functions to generate the membership function matrix U:

(9)

​ is the membership function for the indicator under the assessment of “suitable” while represents the membership function for the indicator of “unsuitable”, *i*=1,2,3,…, .

*Calculate the comprehensive evaluation matrix*

(10)

(11)

is a evaluation vector, and W is a weight vector. The final evaluation,, represents the maximum value among .
