# Supplementary material for: Is it necessary to add the medial plate for internal fixation of distal femur fractures? —Algorithm-based decision-making for medial plate application
Source: Research Square preprint supplement (doi:10.21203/rs.3.rs-7417934/v1), 2025-09-04
Supplement: Supplementary file 2 [file e7c04884d373aa70ffcbc31d.docx]

Table 1: Material properties used in the study.

|  | E(GPa) | Poisson’s ratio |
| --- | --- | --- |
| Cortical bone | 16.7 | 0.26 |
| Trabecular bone | 0.155 | 0.3 |
| Screws and plates (Ti-6AL-4V) | 105 | 0.35 |

Table 2: Fitting Function Parameters under axial loading.

| Parameters | | y0 | A1 | t1 | R-square |
| --- | --- | --- | --- | --- | --- |
| Function equation | | y = A1*exp(-x/t1) + y0 | | | |
| Axial Stiffness (N/mm) | LLP-only | 22.387 | 174.105 | 1.525 | 0.998 |
| DP | 200.628 | 18.728 | 3.105 | 0.955 |
| Peak VMS of LLP (MPa) | LLP-only | 938.125 | -820.808 | 2.524 | 0.977 |
| DP | 103.879 | -2.784 | 11.154 | 0.974 |
| Axial micromotion at fracture defect (mm) | LLP-only | 3.517 | -3.374 | 5.603 | 0.927 |
| DP | 0.0957 | -0.076 | 4.123 | 0.932 |

Table 3: Fitting Function Parameters under torsional Loading.

| Parameters | | y0 | A1 | t1 | R-square |
| --- | --- | --- | --- | --- | --- |
| Function equation | | y = A1*exp(-x/t1) + y0 | | | |
| Torsional Stiffness (N/deg) | LLP-only | -56.304 | 69.947 | 301.731 | 0.975 |
| DP | -94.470 | 118.138 | 356.411 | 0.882 |
| Peak VMS of LLP (MPa) | LLP-only | 144.116 | -8.971 | 16.663 | 0.862 |
| DP | 34.642 | 10.581 | -22.298 | 0.902 |
| Torsional micromotion at fracture defect (mm) | LLP-only | -0.827 | 1.607 | -247.894 | 0.910 |
| DP | 0.272 | -0.062 | 55.670 | 0.869 |

Table 4: Parameters and restrictive conditions.

| Loading condition | Parameters | Restrictive condition |
| --- | --- | --- |
| Axial loading | Axial stiffness | 50-400 (N/mm)51 |
| Axial micromotion | 0.1-3 (mm)42 |
| Peak VMS of LLP | 0-1014 (MPa)38 |
| Torsional loading | Torsional stiffness | 5-25 (Nm/deg)51 |
| Torsional micromotion | 0-1.5 (mm)46 |
| Peak VMS of LLP | 0-455 (MPa)38 |

Table 5: Information of enrolled cases (P＜0.05(*)).

|  | LLP-only (n=38) | DP (n=17) | P |
| --- | --- | --- | --- |
| Age (y) | 57.26±19.15 | 57.29±24.16 | 0.514 |
| Gender (M/F) | 18/20 | 7/10 | 0.670 |
| BMI | 24.64±3.33 | 25.98±5.79 | 0.297 |
| The size of defect (mm) | 11.00±20.62 | 40.66±29.28 | ＜0.001* |
| Classification |  |  | 0.024* |
| AO/ASIF type |  |  |  |
| A (A1/A2/A3) | 8/6/9 | 0/0/6 |  |
| B (B1) | 3 | 0 |  |
| C (C1/C2/C3) | 2/5/3 | 0/8/2 |  |
| Periprosthetic Fractures |  |  |  |
| Rorabeck type (Ⅰ/Ⅱ/Ⅲ) | 1/1/0 | 1/0/0 |  |
| bone union (union /nonunion) | 32/6 | 12/5 | 0.422 |

Table 6: Information of the LLP-only group, including the original 38 cases along with 6 additional cases of old nonunion fractures sourced from external hospitals (P＜0.05(*)).

| **LLP-only** | Defect size≤13.4 mm (n=33) | Defect size>13.4 mm (n=11) | P |
| --- | --- | --- | --- |
| **Information of operation** |  |  |  |
| Blood loss (ml) | 280.00±171.26 | 400.00±279.28 | 0.096 |
| Operative time (hours) | 2.65±0.89 | 3.96±2.69 | 0.144 |
| Hospitalization time (days) | 10.62±5.21 | 16.72±11.97 | 0.023* |
| **Information of follow-up** |  |  |  |
| Bone union (union /nonunion) | 32/1 | 0/11 | ＜0.001* |
| Follow-up (years) | 3.09±1.67 | 3.23±1.69 | 0.818 |
| Lysholm score | 85±12.25 | 77.18±6.00 | 0.037* |
| Knee ROM ° | 96.36±14.38 | 81.18±21.64 | 0.011* |
| EQ-5D-3L score | 0.93±0.11 | 0.87±0.19 | 0.186 |
